# Supplementary material for: Effects of the Hydrophilic–Lipophilic Balance of Alternating Peptides on Self-Assembly and Thermo-Responsive Behaviors
Source: PubMed Central journal article supplement (PMC6770757; doi:10.3390/ijms20184604), 2019-09-17
Supplement: ijms-20-04604-s001.pdf [file ijms-20-04604-s001.pdf]

## Supplementary Materials

# Effects of Hydrophilic-Lipophilic Balance of Alternating Peptides on Self-Assembly and Thermo-Responsive Behaviors

Abu Bin Ihsan, Mahmuda Nargis, Yasuhito Koyama\*

Department of Pharmaceutical Engineering, Faculty of Engineering  
Toyama Prefectural University, 5180 Kurokawa, Imizu, Toyama 939-0398, Japan

\*E-mail: ykoyama@pu-toyama.ac.jp

### Contents

|                                                                               |    |
|-------------------------------------------------------------------------------|----|
| DOSY and IR Spectra of Poly(Gly- <i>alter</i> -L-Val) .....                   | 2  |
| <sup>1</sup> H NMR, <sup>13</sup> C NMR, DOSY, and IR Spectra of Et-Pep ..... | 5  |
| <sup>1</sup> H NMR, <sup>13</sup> C NMR, DOSY, and IR Spectra of HE-Pep ..... | 9  |
| <sup>1</sup> H NMR, <sup>13</sup> C NMR, DOSY, and IR Spectra of Pr-Pep ..... | 13 |
| <sup>1</sup> H NMR, <sup>13</sup> C NMR, DOSY, and IR Spectra of Me-Pep ..... | 17 |
| UV-vis Spectra .....                                                          | 21 |
| Table for CMC, cloud point, and hydrodynamic radius .....                     | 22 |

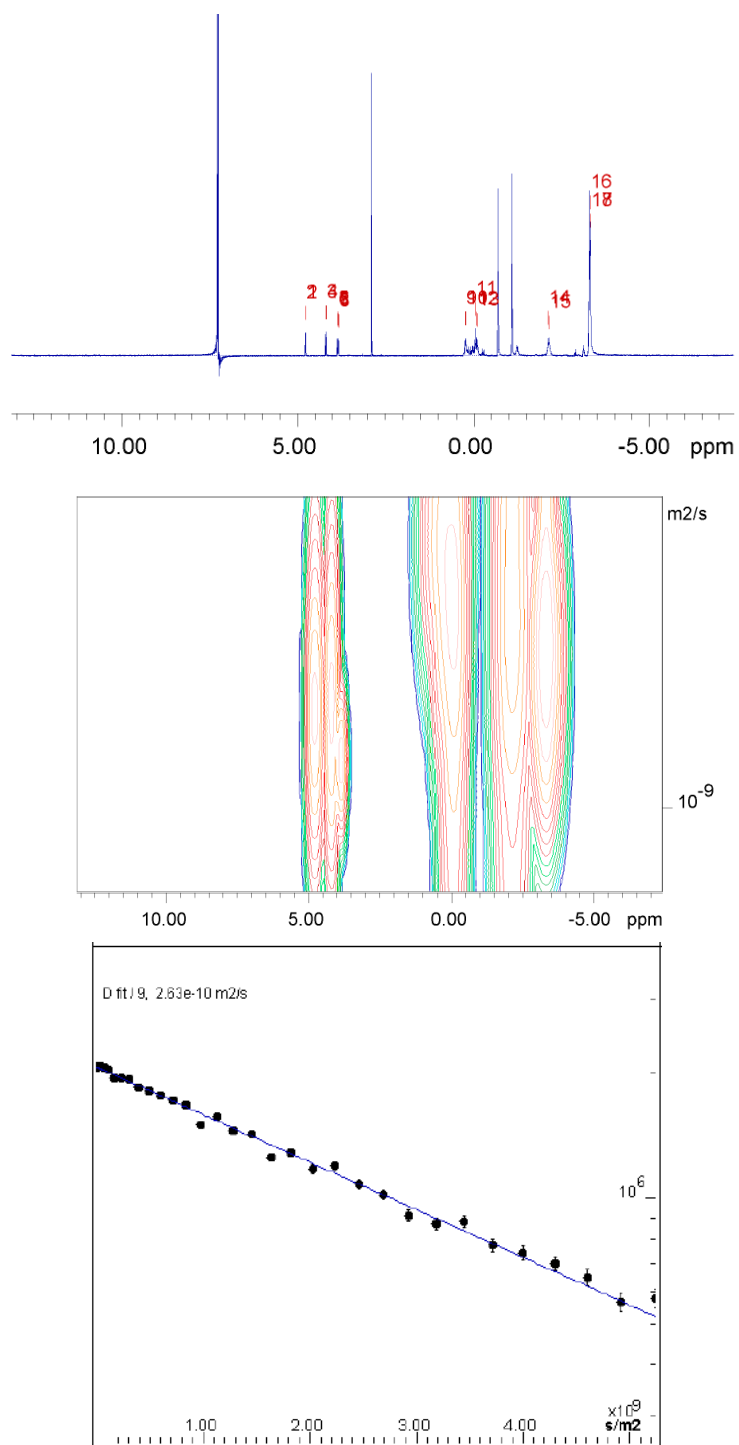

**Figure S1:** DOSY correlations of **Poly(Gly-*alter*-L-Val)** (400 MHz, TFA-*d*, 298 K) and the attenuation curve.

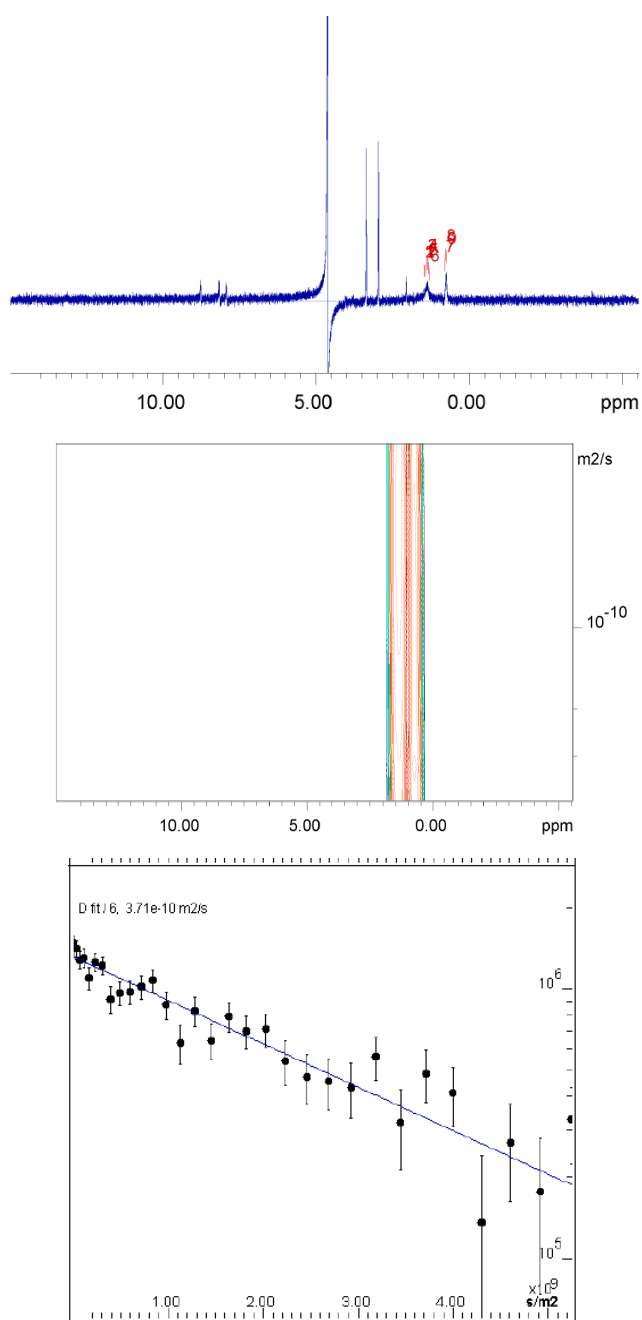

**Figure S2:** DOSY correlations of **Poly(Gly-*alter*-L-Val)** (400 MHz, D<sub>2</sub>O, 298 K) and the attenuation curve.

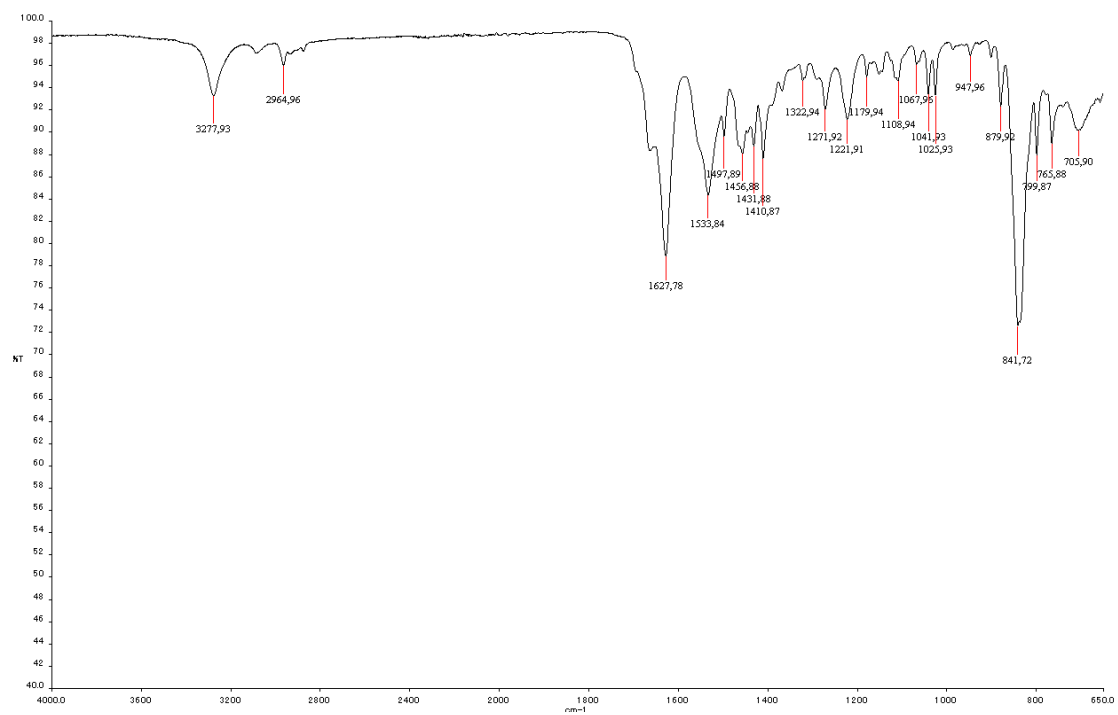

**Figure S3:** IR spectrum of Poly(Gly-*alter*-L-Val) (ATR).

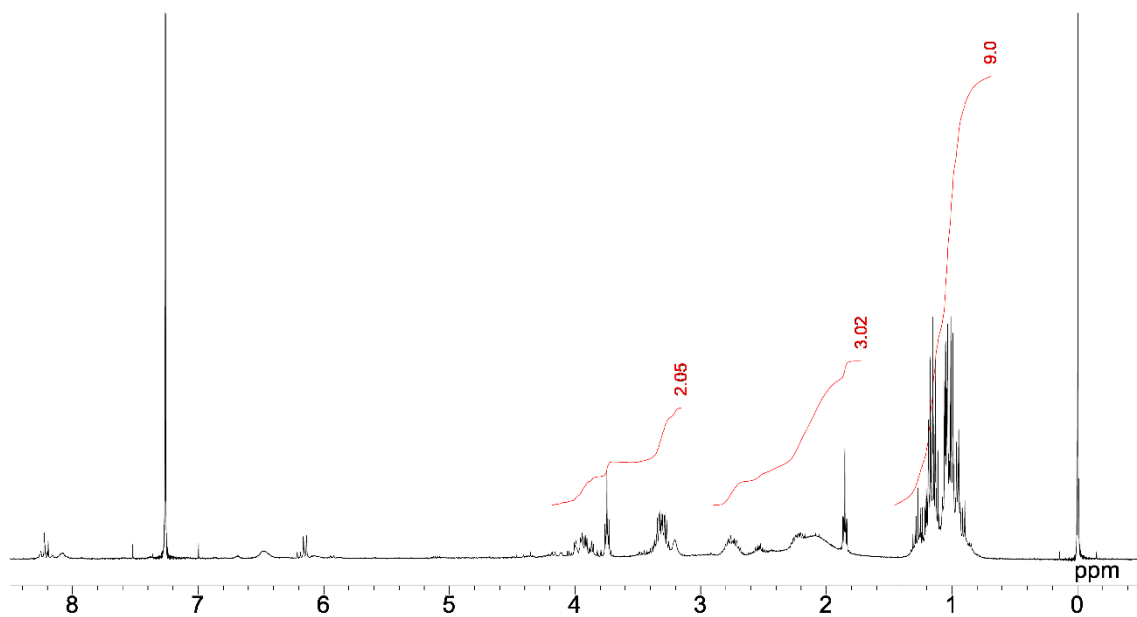

**Figure S4:** <sup>1</sup>H NMR spectrum of **Et-Pep** (400 MHz, CDCl<sub>3</sub>, 298 K).

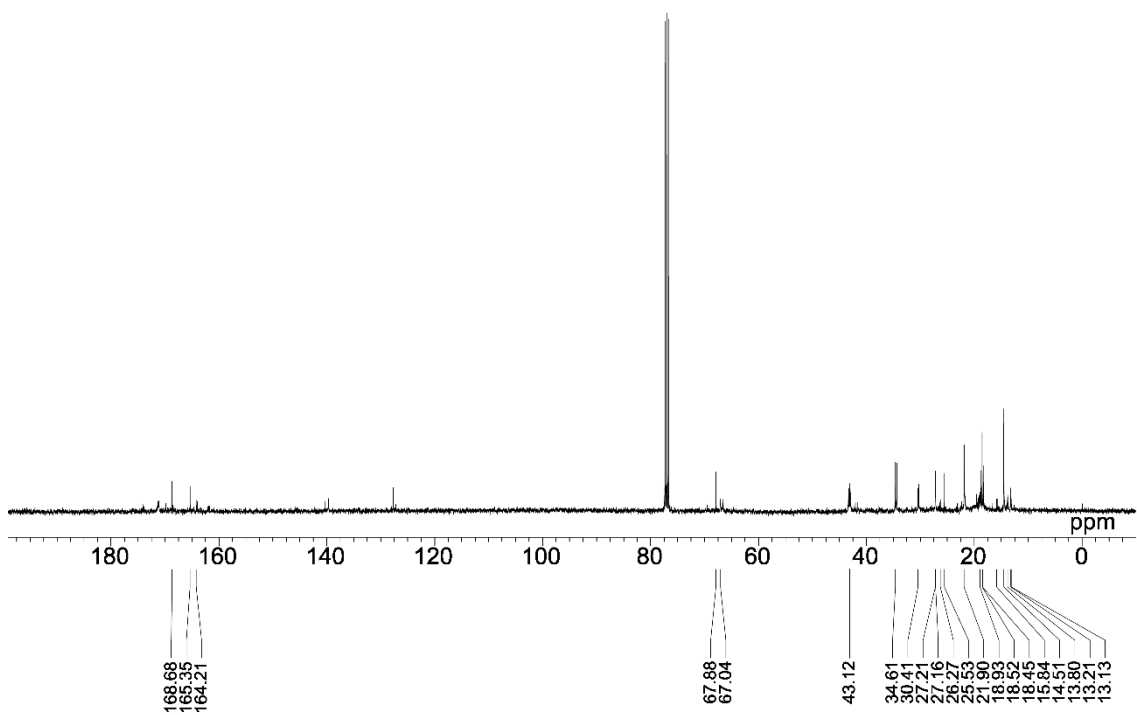

**Figure S5:** <sup>13</sup>C NMR spectrum of **Et-Pep** (100 MHz, CDCl<sub>3</sub>, 298 K).

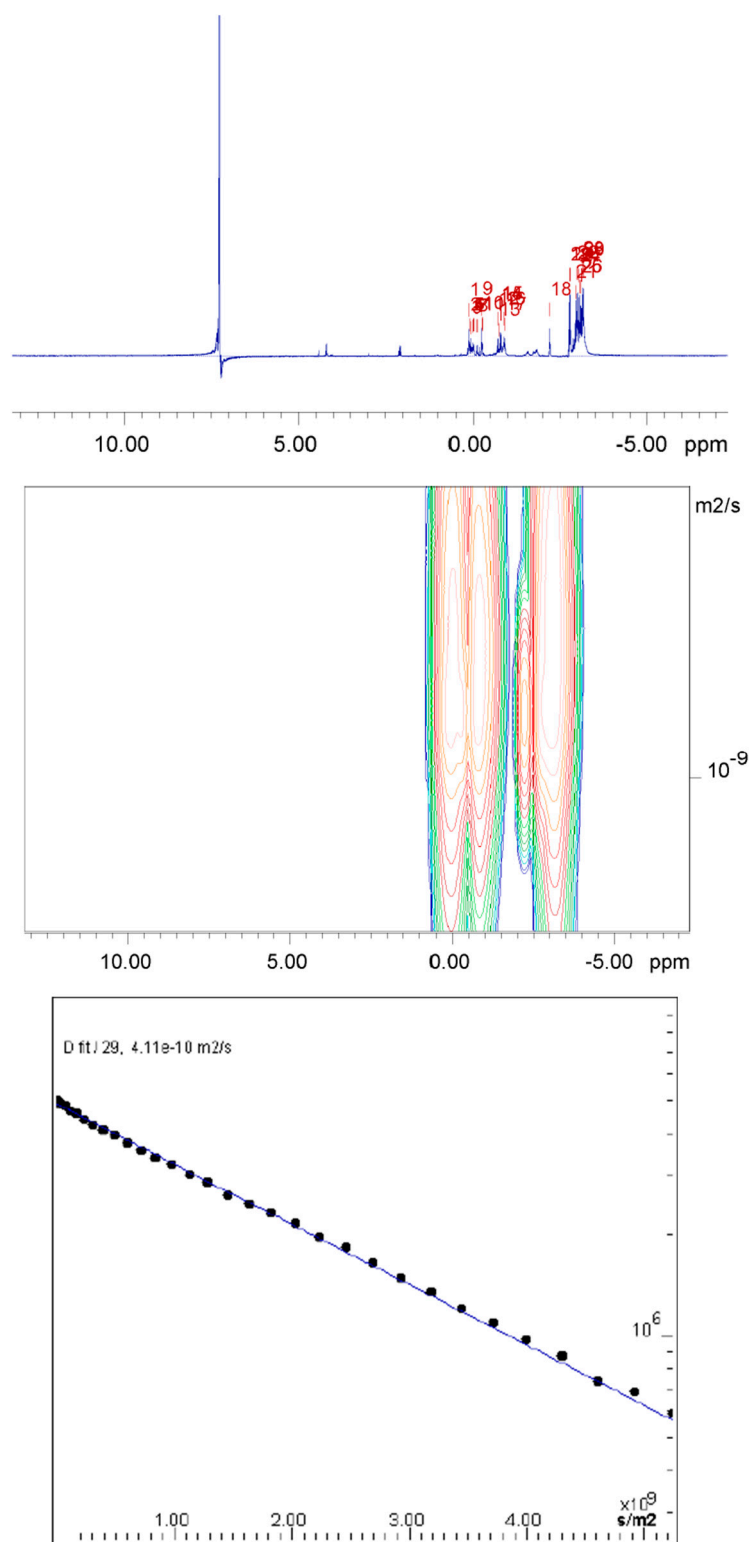

**Figure S6:** DOSY correlations of **Et-Pep** (400 MHz, TFA-*d*, 298 K) and the attenuation curve.

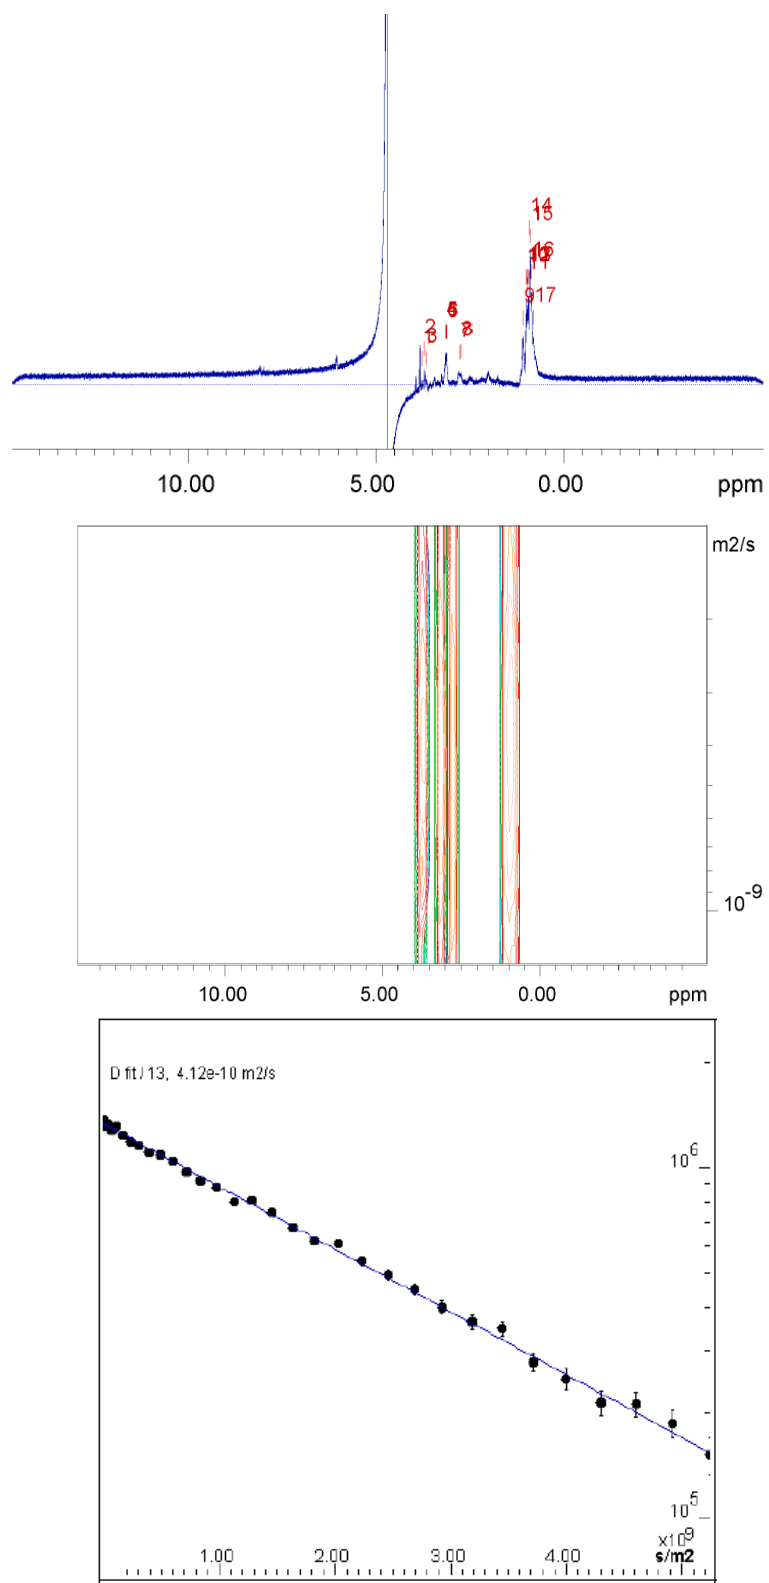

**Figure S7:** DOSY correlations of **Et-Pep** (400 MHz, D<sub>2</sub>O, 298 K) and the attenuation curve.

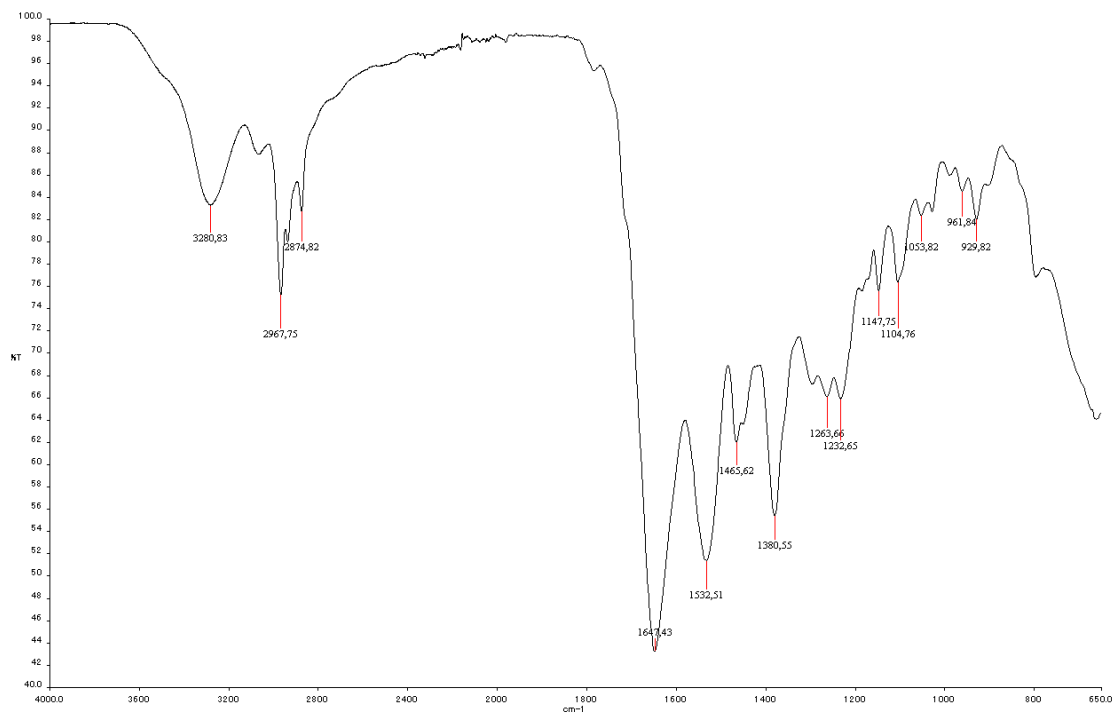

**Figure S8:** IR spectrum of Et-Pep (ATR).



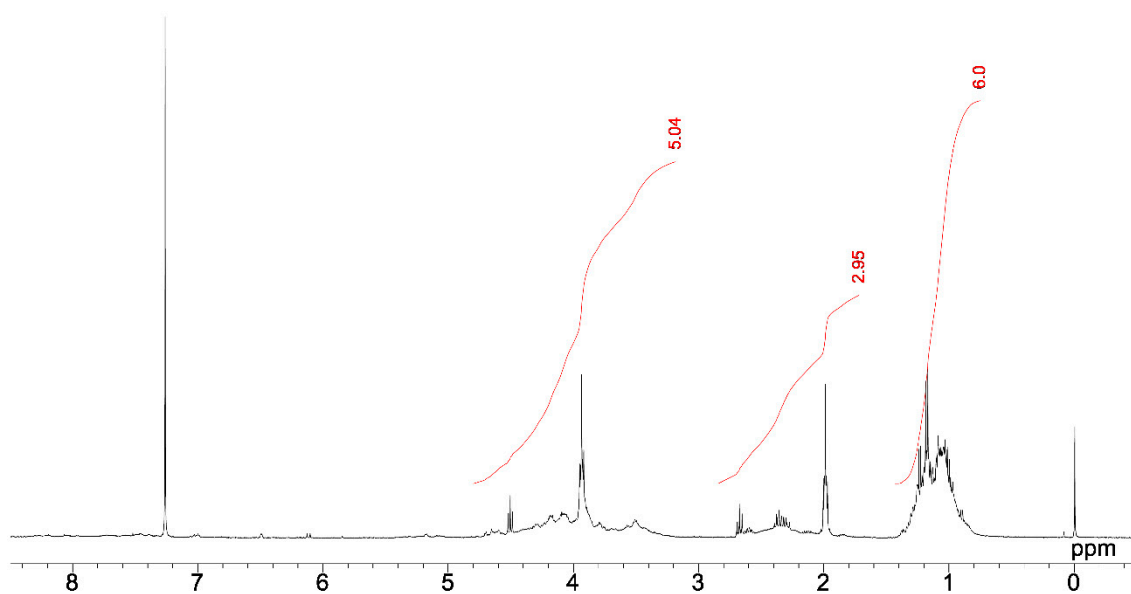

**Figure S9:**  $^1\text{H}$  NMR spectrum of **HE-Pep** (400 MHz,  $\text{CDCl}_3$ , 298 K).

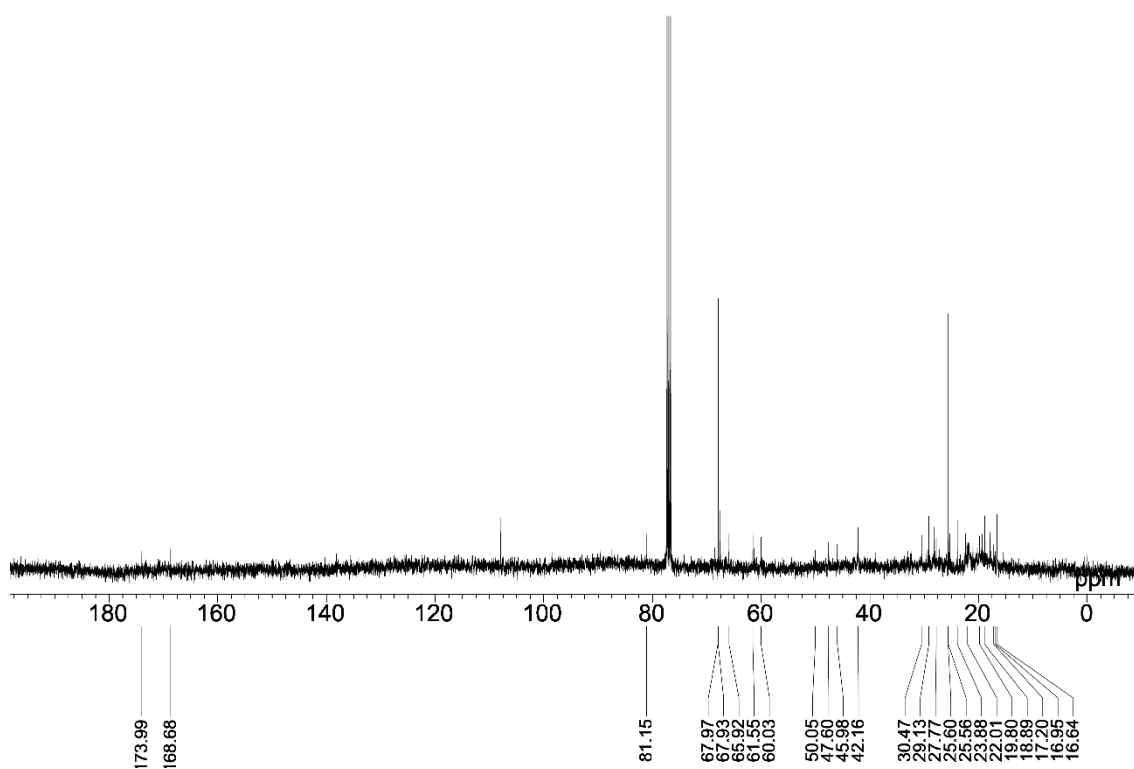

**Figure S10:**  $^{13}\text{C}$  NMR spectrum of **HE-Pep** (100 MHz,  $\text{CDCl}_3$ , 298 K).

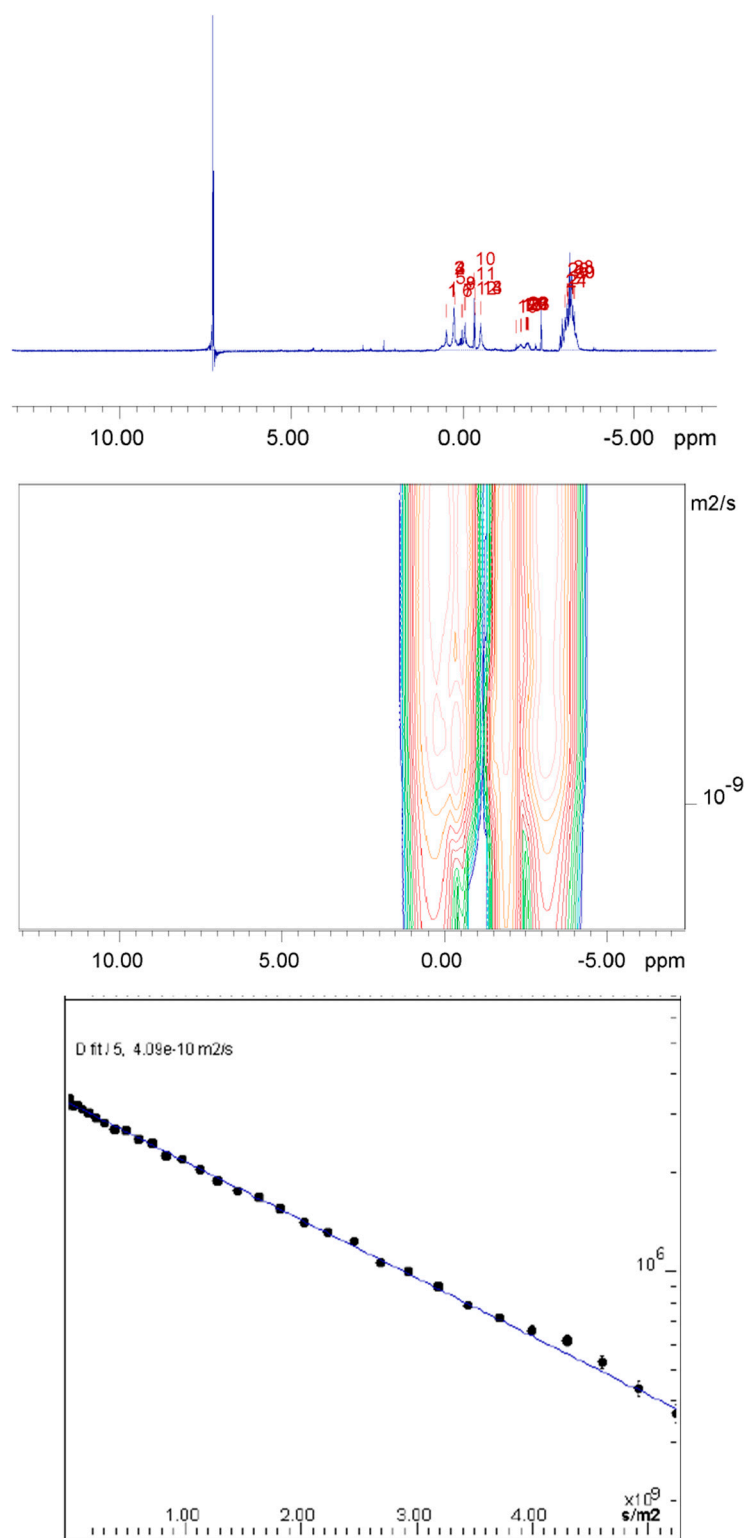

**Figure S11:** DOSY correlations of **HE-Pep** (400 MHz, TFA-*d*, 298 K) and the attenuation curve.



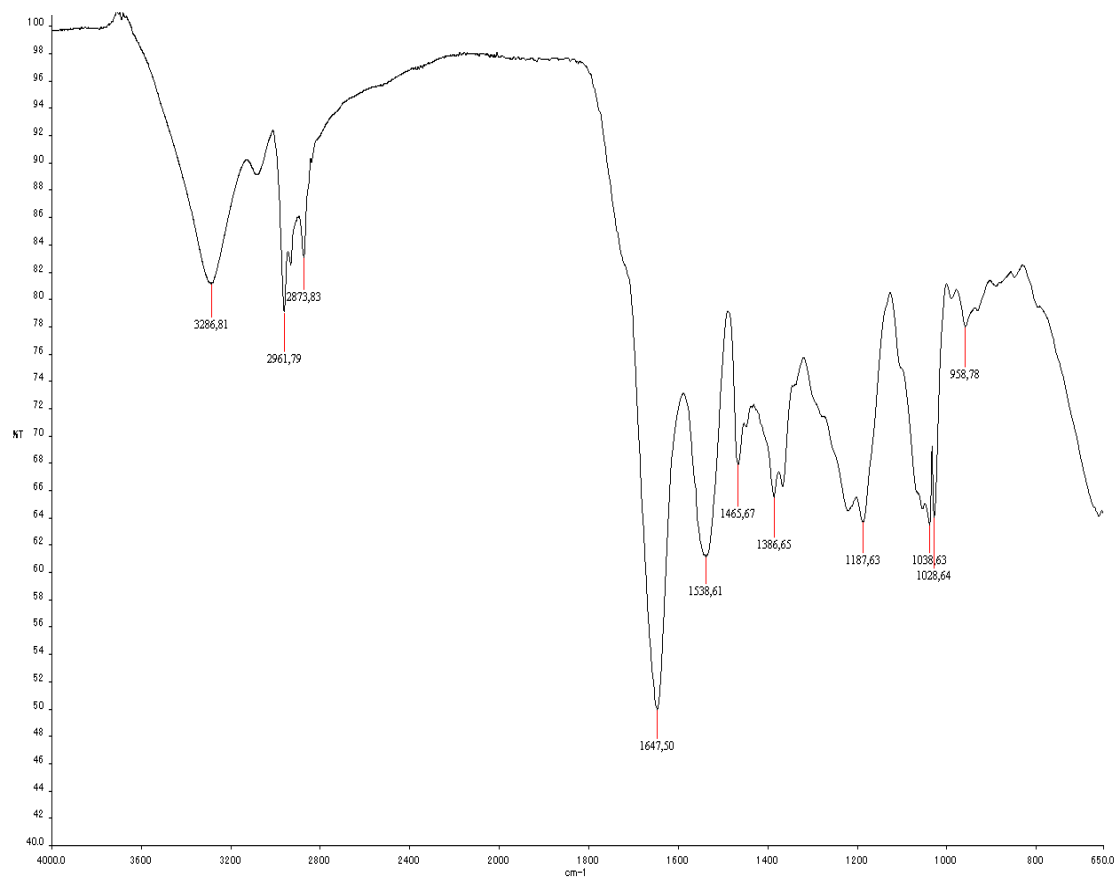

**Figure S13:** IR spectrum of **HE-Pep** (ATR).

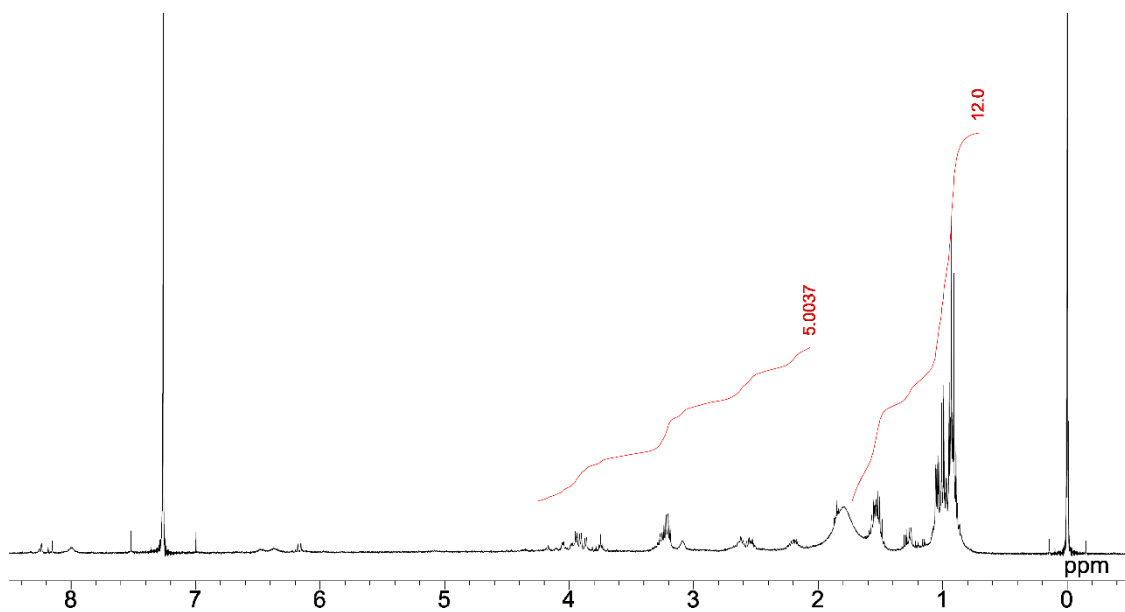

**Figure S14:**  $^1\text{H}$  NMR spectrum of **Pr-Pep** (400 MHz,  $\text{CDCl}_3$ , 298 K).

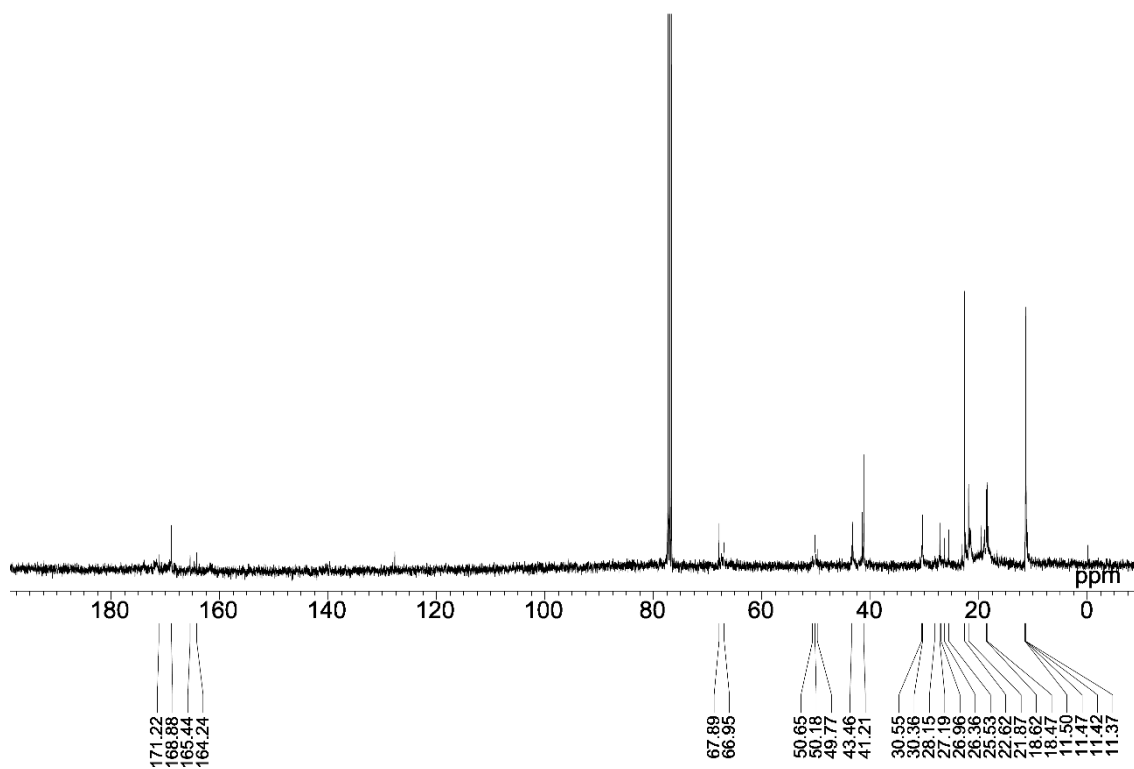

**Figure S15:**  $^{13}\text{C}$  NMR spectrum of **Pr-Pep** (100 MHz,  $\text{CDCl}_3$ , 298 K).

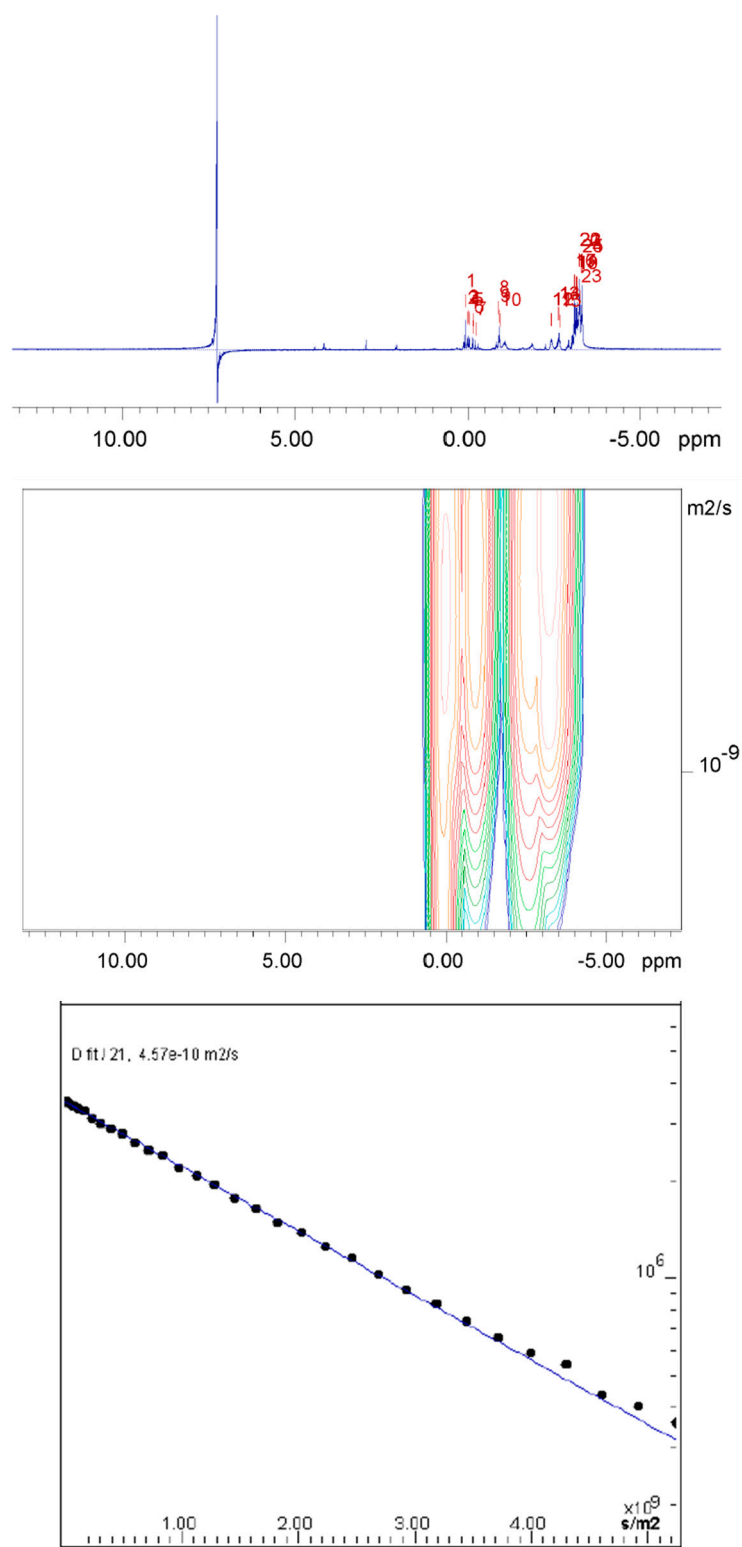

**Figure S16:** DOSY correlations of **Pr-Pep** (400 MHz, TFA-*d*, 298 K) and the attenuation curve.

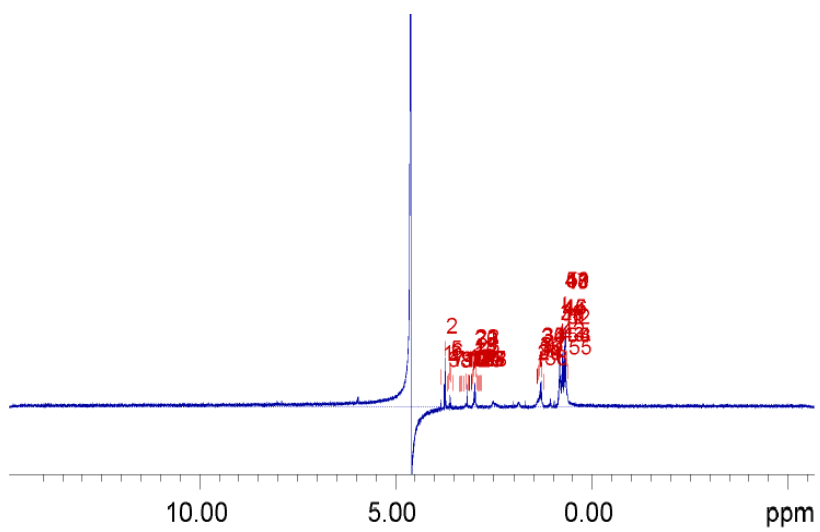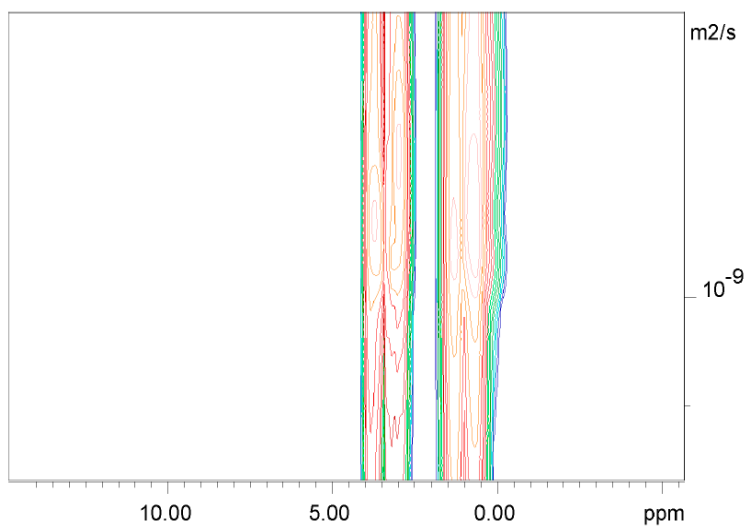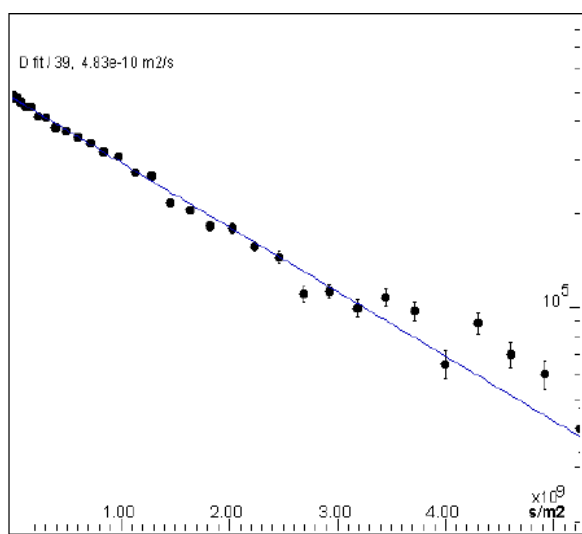

**Figure S17:** DOSY correlations of **Pr-Pep** (400 MHz, D<sub>2</sub>O, 298 K) and the attenuation curve.

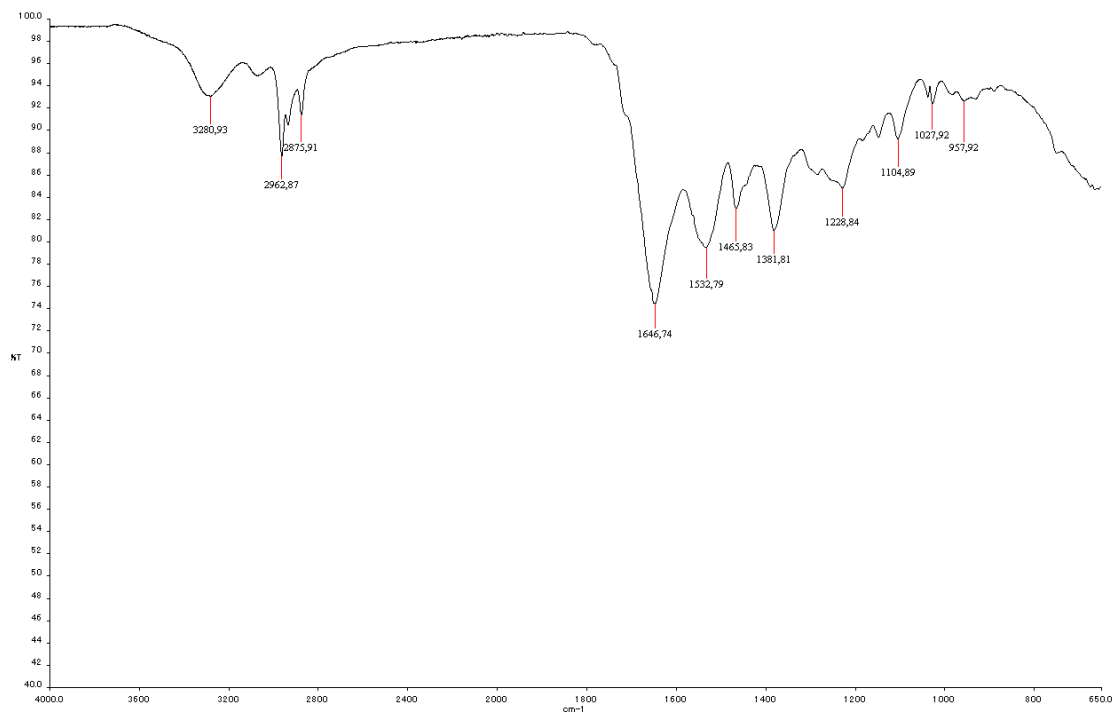

**Figure S18:** IR spectrum of Pr-Pep (ATR).



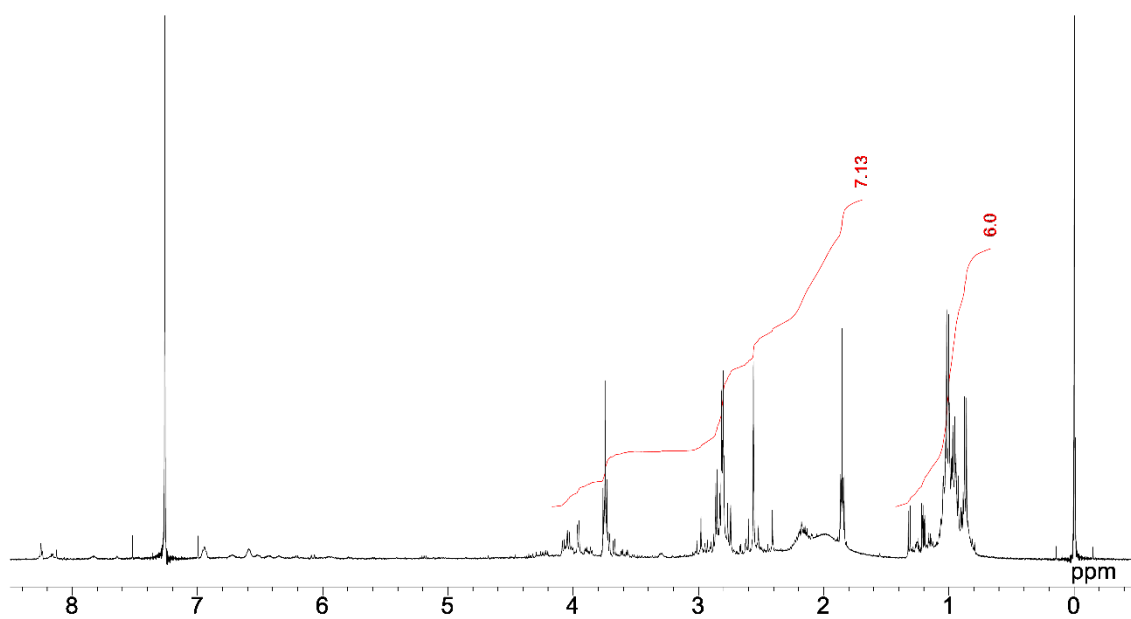

**Figure S19:**  $^1\text{H}$  NMR spectrum of **Me-Pep** (400 MHz,  $\text{CDCl}_3$ , 298 K).

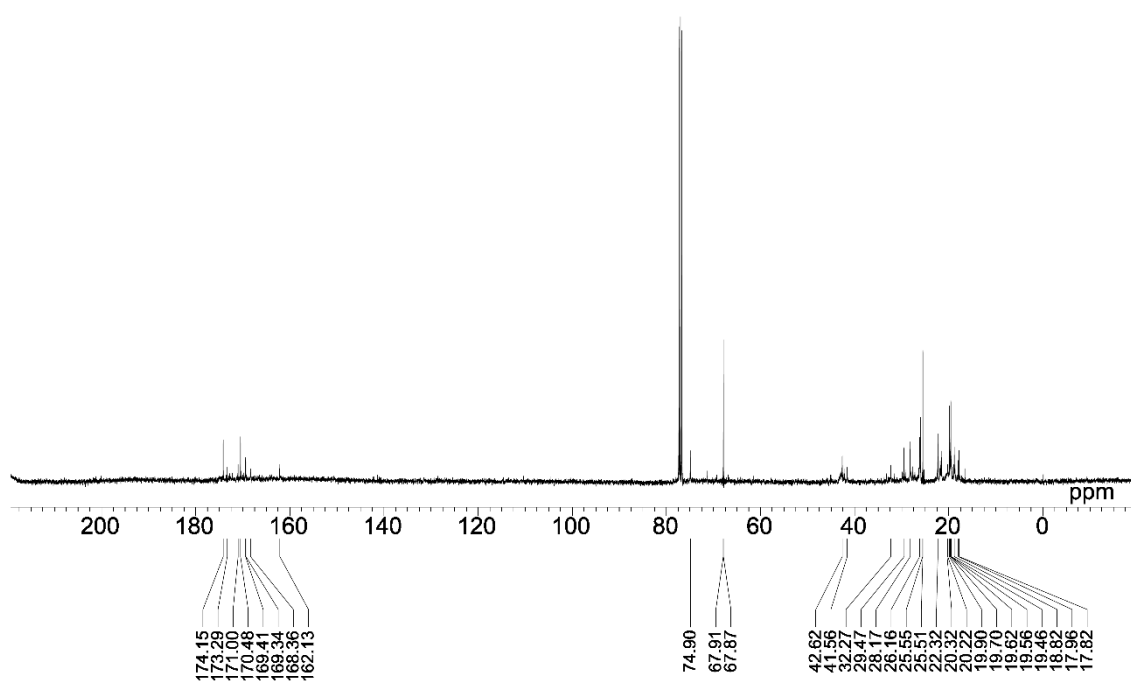

**Figure S20:**  $^{13}\text{C}$  NMR spectrum of **Me-Pep** (100 MHz,  $\text{CDCl}_3$ , 298 K).

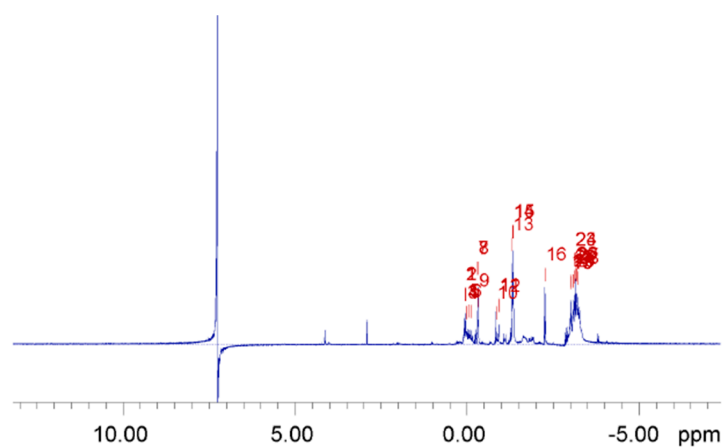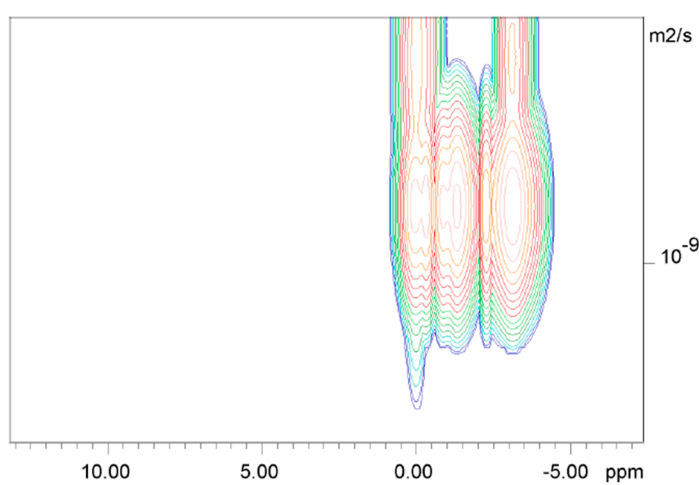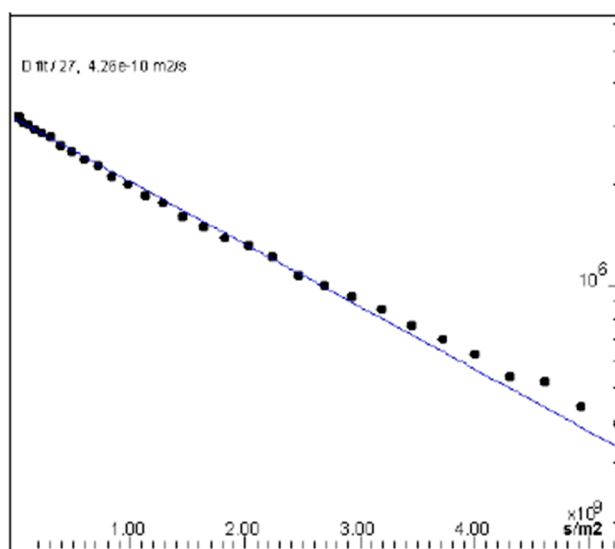

**Figure S21:** DOSY correlations of Me-Pep (400 MHz, TFA-*d*, 298 K) and the attenuation curve.

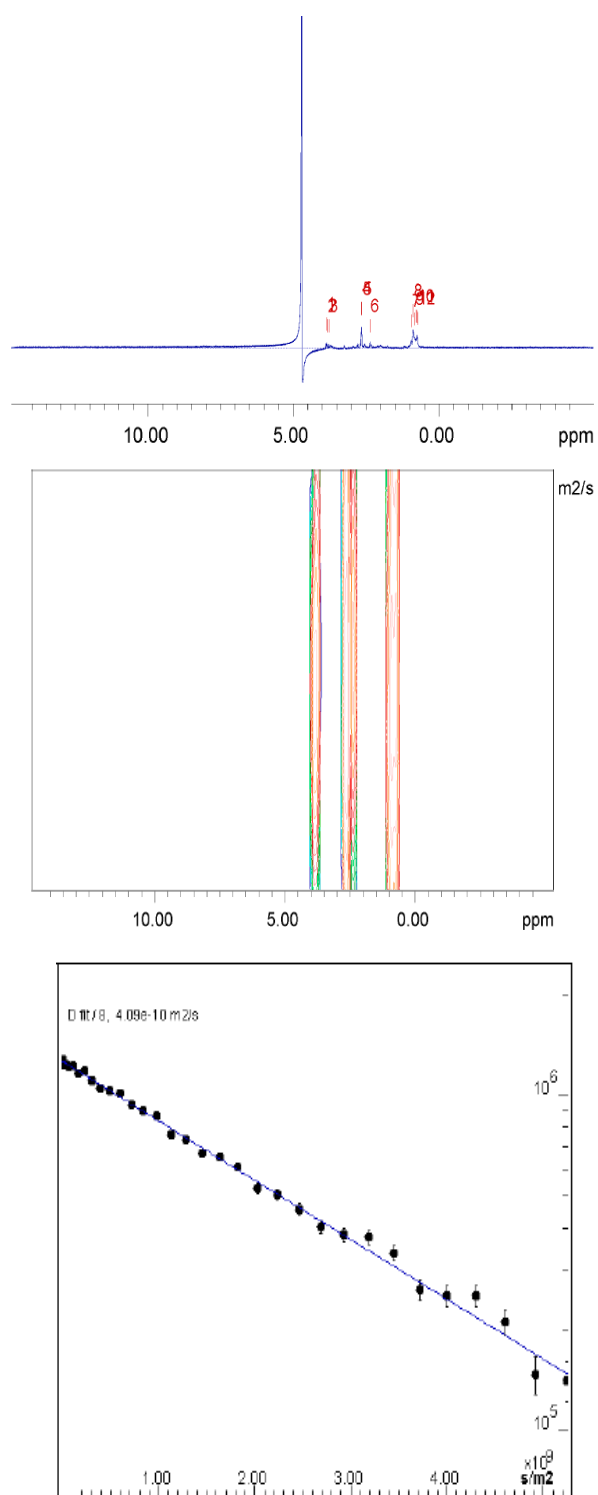

**Figure S22:** DOSY correlations of **Me-Pep** (400 MHz, D<sub>2</sub>O, 298 K) and the attenuation curve.

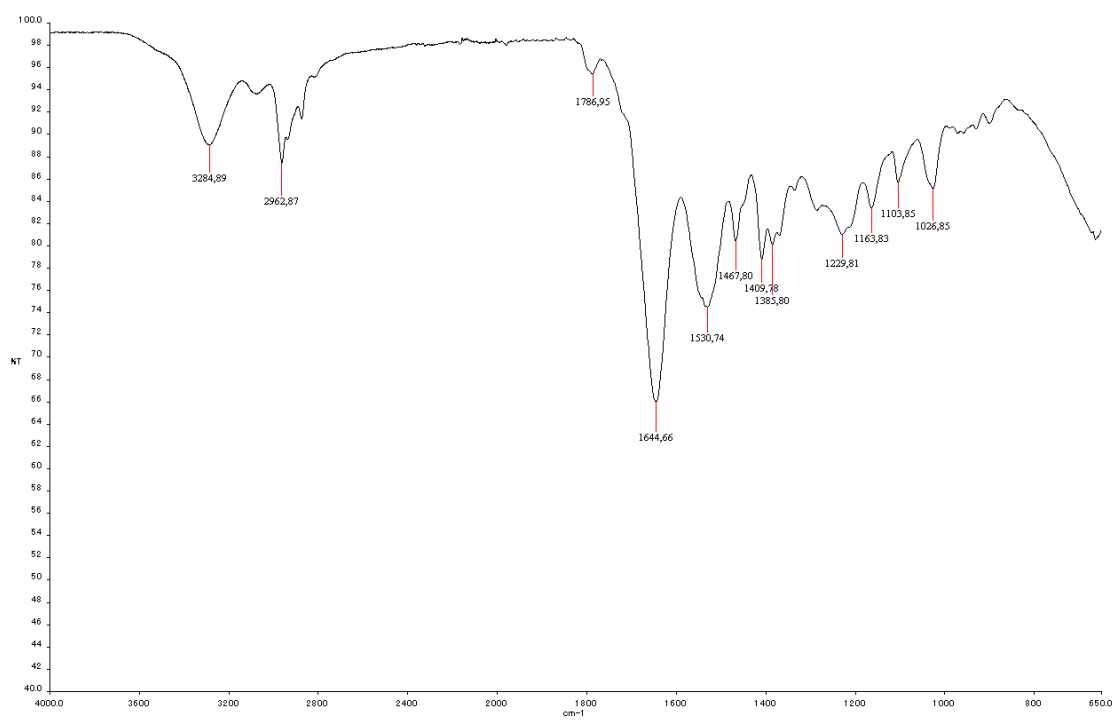

**Figure S23:** IR spectrum of Me-Pep (ATR).

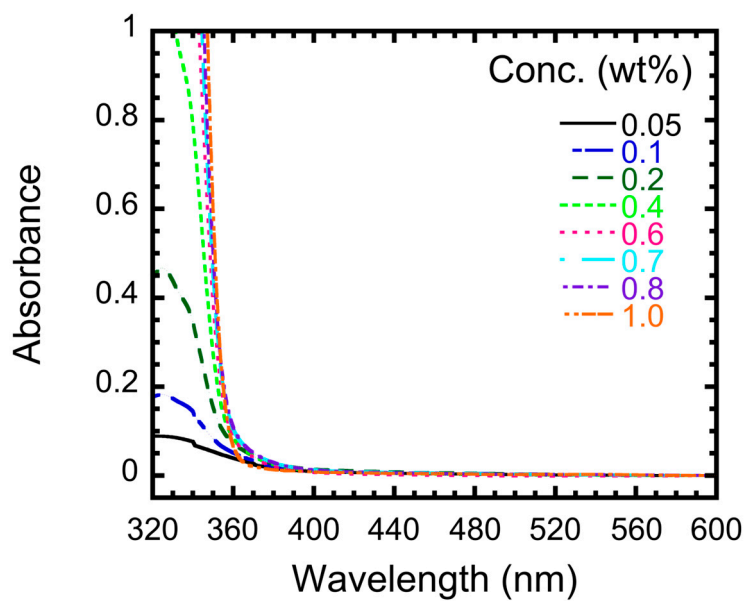

**Figure S24.** UV-vis spectra of Poly(Gly-*alter*-L-Val) in H<sub>2</sub>O at various concentrations at 25 °C.

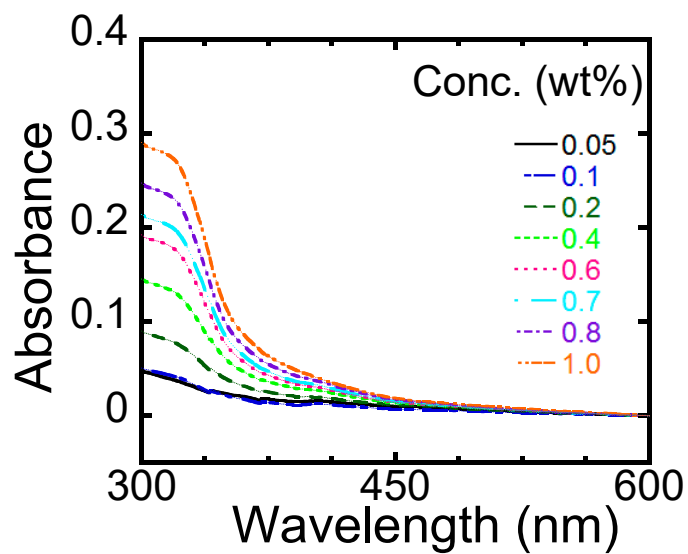

**Figure S25.** UV-vis spectra of Et-Pep in H<sub>2</sub>O at various concentrations at 25 °C.

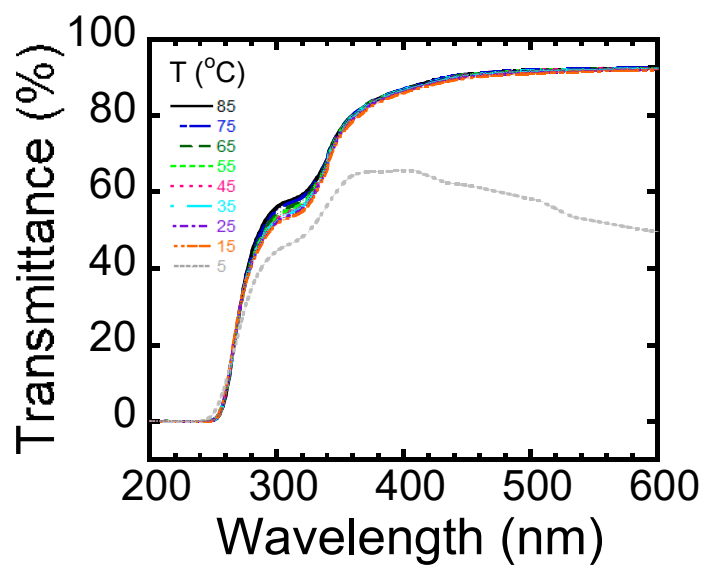

**Figure S26.** UV-vis spectra of **Et-Pep** in H<sub>2</sub>O at various temperatures (1.5 wt%).

**Table S1.** CMC, cloud point, and hydrodynamic radius ( $R_h$ ) of **Poly(Gly-*alter*-L-Val)**, **Et-Pep**, and **Me-Pep**.<sup>a</sup>

| Alternating Peptide                 | CMC<br>(wt%) | Cloud<br>point<br>(°C) | $R_h$ in<br>D <sub>2</sub> O<br><br>( $R_{water}$ ,<br>nm) | $R_h$ in<br>TFA- <i>d</i><br><br>( $R_{TFA}$ ,<br>nm) | $R_{water} /$<br>$R_{TFA}$ |
|-------------------------------------|--------------|------------------------|------------------------------------------------------------|-------------------------------------------------------|----------------------------|
| <b>Poly(Gly-<i>alter</i>-L-Val)</b> | 0.2          | 15                     | 0.600 ±<br>0.031                                           | 0.907 ±<br>0.015                                      | 0.66                       |
| <b>Et-Pep</b>                       | 0.2          | 10                     | 0.527 ±<br>0.005                                           | 0.556 ±<br>0.012                                      | 0.95                       |
| <b>MePep</b>                        | 0.2          | 15                     | 0.538 ±<br>0.015                                           | 0.542 ±<br>0.010                                      | 0.99                       |

<sup>a</sup> Standard deviations are from three samples.
